# Supplementary material for: Exploring neoglycoprotein assembly through native chemical ligation using neoglycopeptide thioesters prepared via N→S acyl transfer
Source: Royal Society of Chemistry journal article supplement (doi:10.1039/b920535g), 2010-01-01

**Supporting Information for Exploring neoglycoprotein assembly through native chemical ligation using neoglycopeptide thioesters prepared via N→S acyl transfer**

Jonathan P. Richardson, Chung-Hei Chan, Javier Blanc, Mona Saadi and Derek

Macmillan \*

Racemisation of D-Ala-Cys and L-Ala-Cys terminated peptide after 48 h reaction:

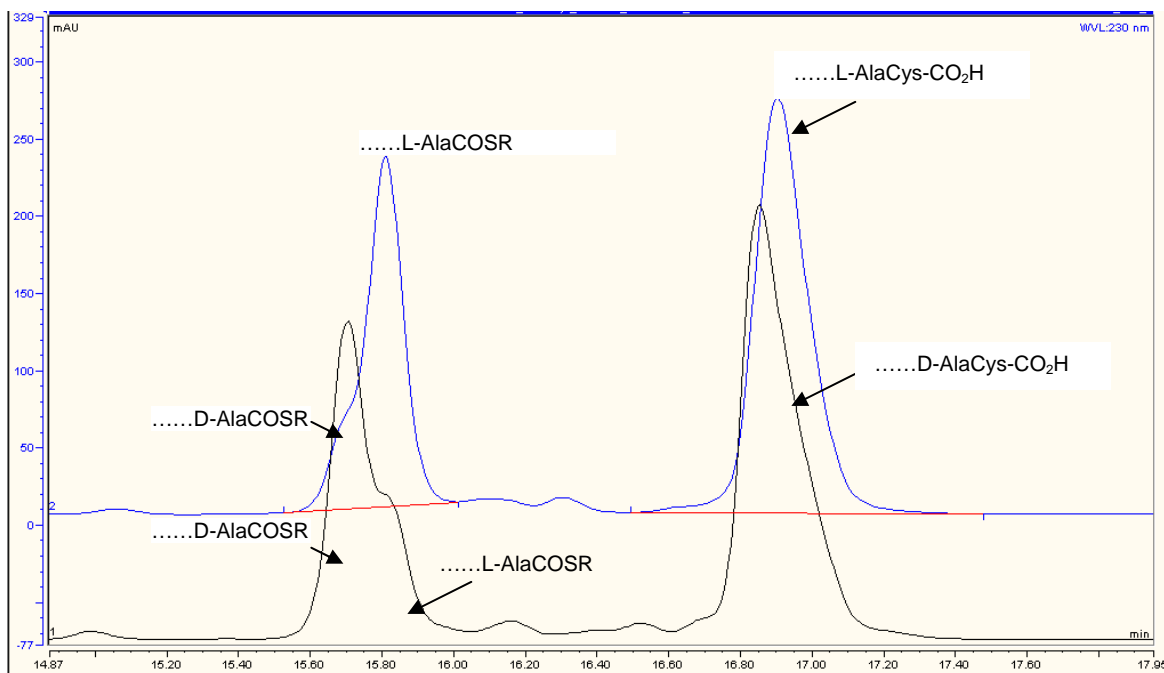

Racemisation of D-Ala-Cys and L-Ala-Cys terminated peptide after 96 h reaction:

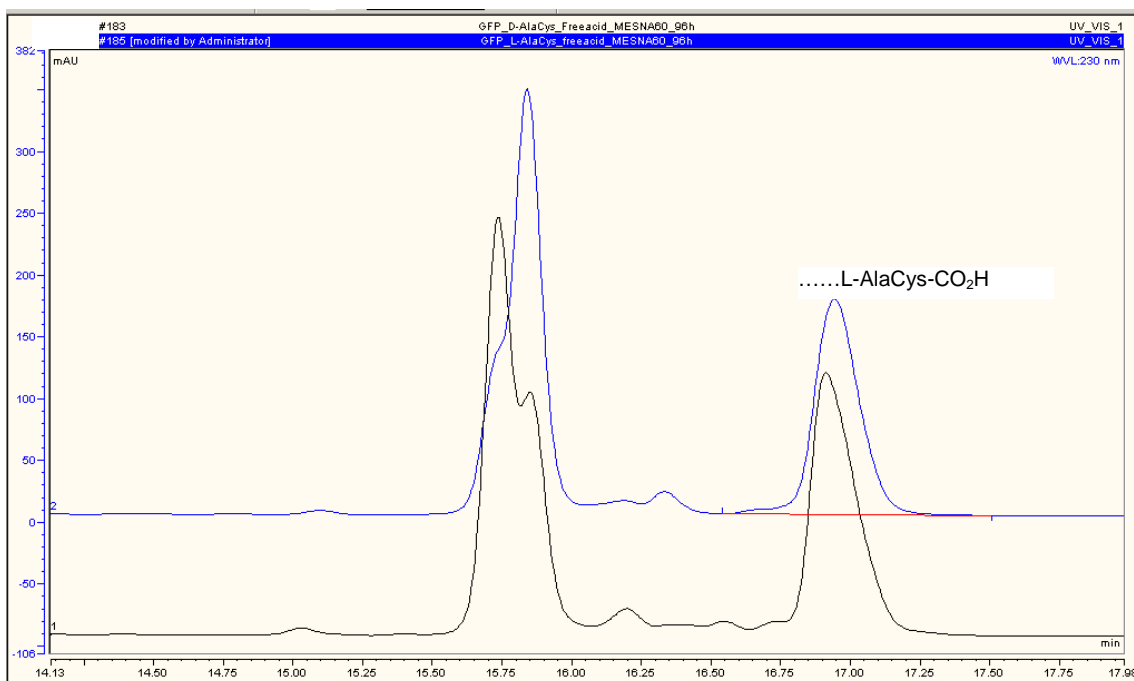

No comparable degree of racemisation is observed in thioesterification of His-Cys, (Me)His-Cys or Cys(Acm)-Cys terminated peptides (acids or amides) after 96 h reaction:

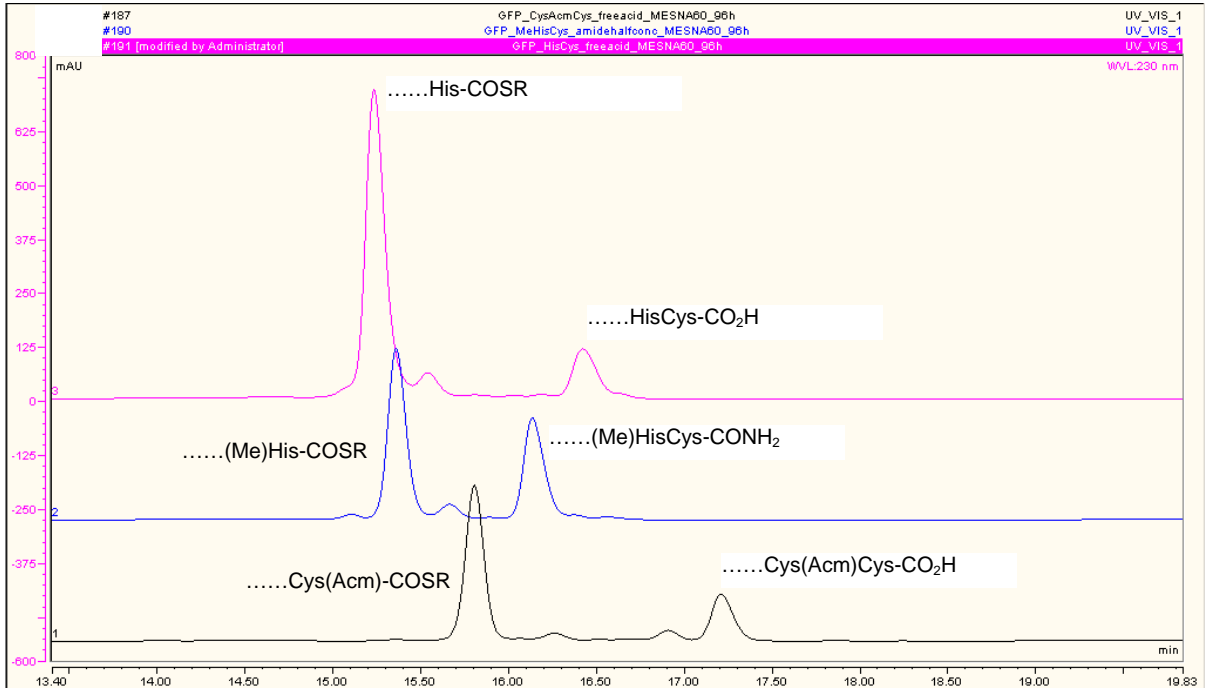

Mass spectrum of recombinant Erythropoietin fragment comprising residues 33 to 166:

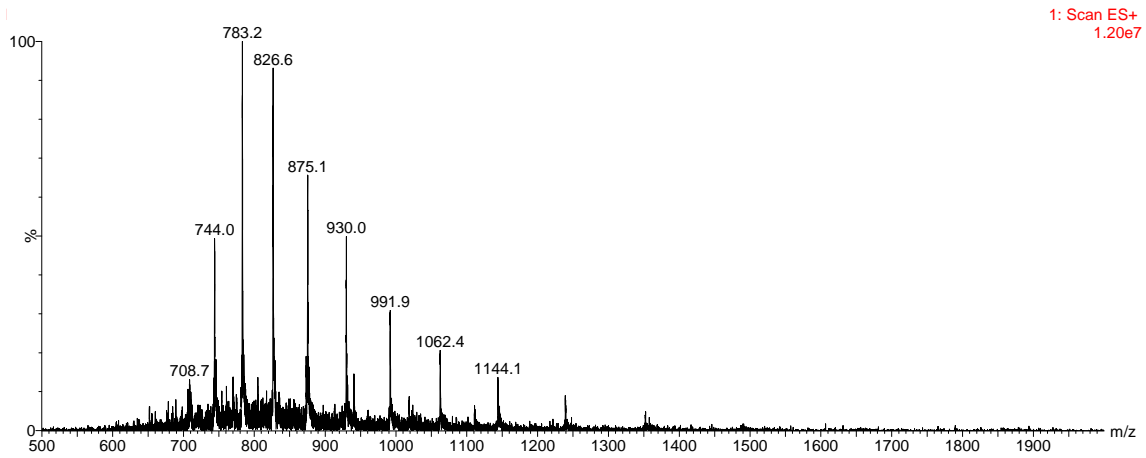

Deconvoluted mass spectrum:

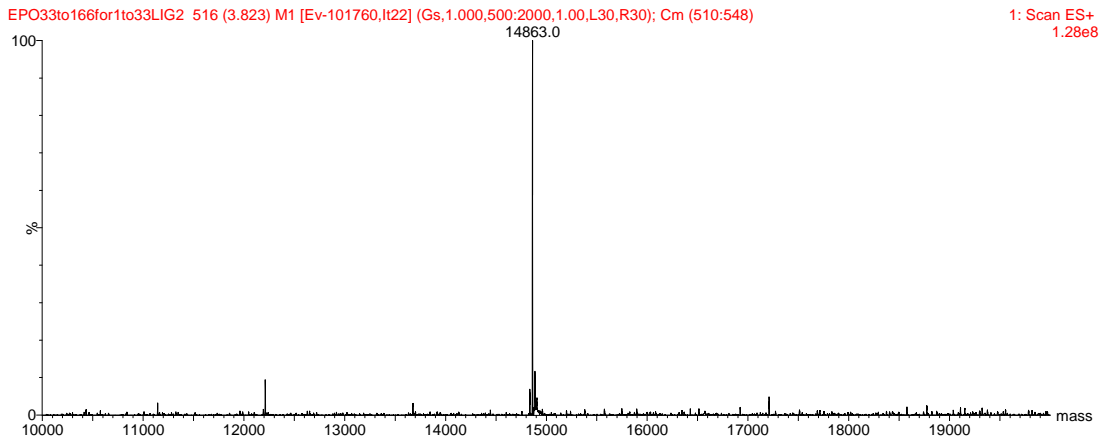

Purification of ligation product:

**C33-166, t=0**

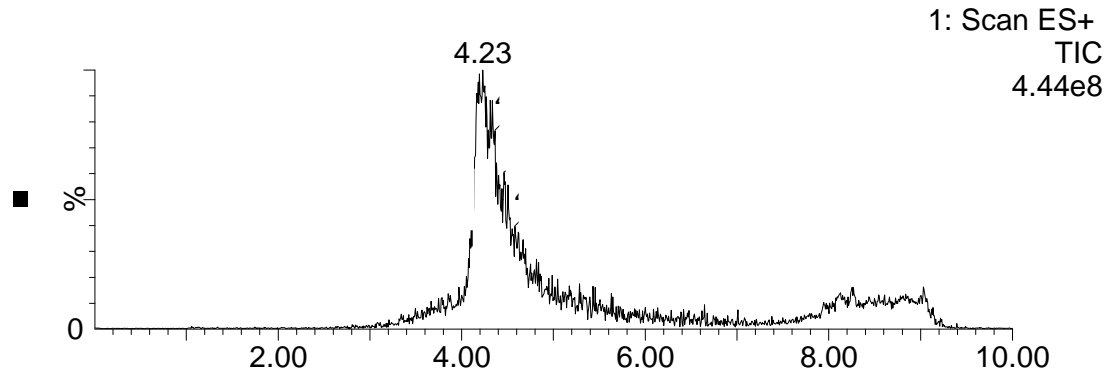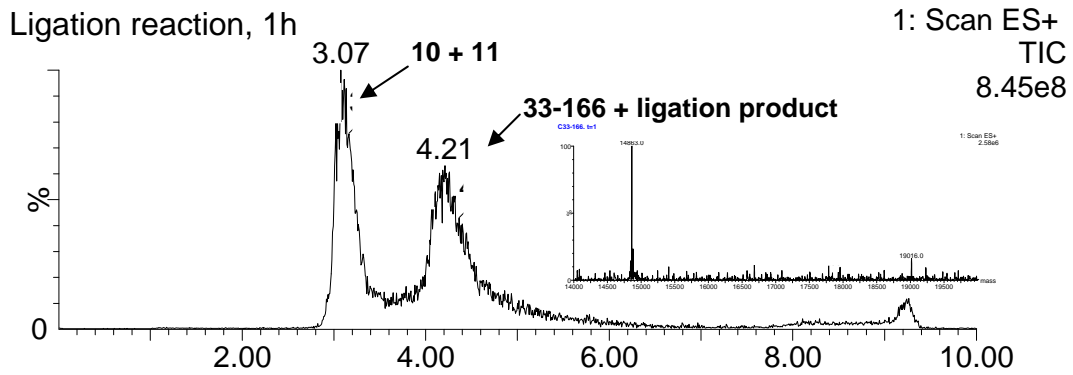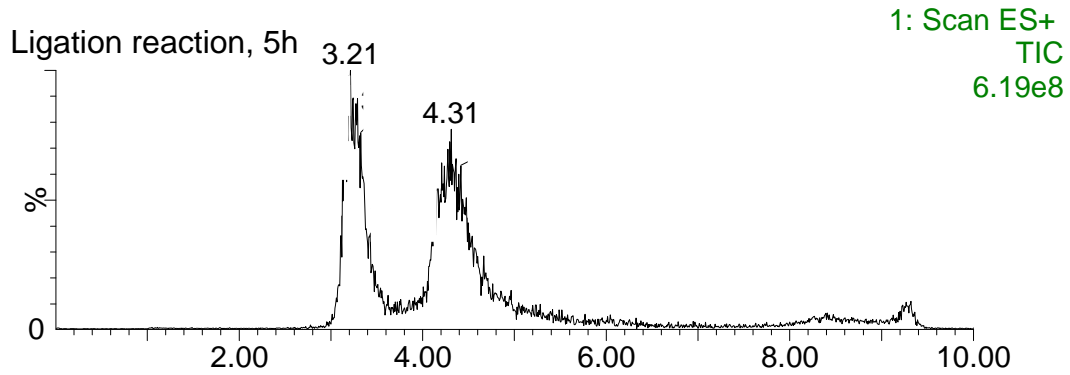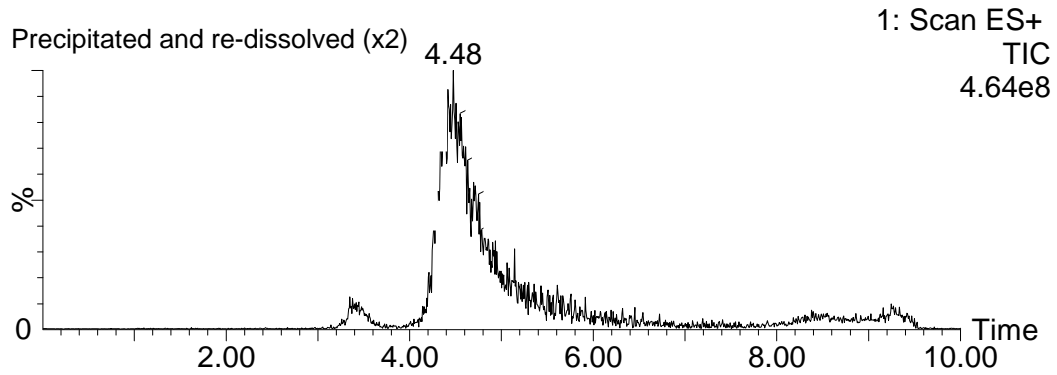

Supplement: b920535g.pdf [file b920535g.pdf]
